# Supplementary material for: Coordinating Expression of RNA Binding Proteins with Their mRNA Targets
Source: PubMed Central journal article supplement (PMC4241525; doi:10.1038/srep07175), 2014-11-24
Supplement: srep07175-s1.pdf [file srep07175-s1.pdf]

# **Coordinating Expression of RNA Binding Proteins with Their mRNA Targets**

Huifeng Jiang<sup>1,2,\*</sup>, Lin Xu<sup>2</sup>, Zhe Wang<sup>2</sup>, Jack Keene<sup>3</sup> & Zhenglong Gu<sup>2,\*</sup>

<sup>1</sup>Key Laboratory of Systems Microbial Biotechnology, Institute of Tianjin Industrial Biotechnology, Chinese Academy of Sciences, Tianjin, China

<sup>2</sup>Division of Nutritional Sciences, Cornell University, Ithaca, New York 14853, USA

<sup>3</sup>Department of Molecular Genetics and Microbiology, Duke University Medical Center, Durham, NC 27701, USA

Supplementary Table 1-2  
Supplementary Figures 1-2

**Supplementary Table 1: The regulatory relationship for the studied RBPs and their target genes.**

| <b>RBPs</b> | <b><i>P-Mean</i><sup>a</sup></b> | <b><i>rho-Mean</i><sup>a</sup></b> | <b><i>P-SD</i><sup>a</sup></b> | <b><i>rho-SD</i><sup>a</sup></b> | <b><i>P-CD</i><sup>a</sup></b> | <b><i>rho-CD</i><sup>a</sup></b> |
|-------------|----------------------------------|------------------------------------|--------------------------------|----------------------------------|--------------------------------|----------------------------------|
| CBF5        | 0.0009039                        | 0.2709                             | 3.92E-06                       | 0.3716                           | 0.005846                       | 0.226                            |
| PAB1        | 0.09274                          | 0.1387                             | 0.008289                       | 0.2163                           | 0.05445                        | 0.1584                           |
| NOP56       | 0.9476                           | 0.0054                             | 0.001406                       | 0.2609                           | 0.9568                         | 0.0045                           |
| TDH3        | 0.3151                           | 0.0834                             | 0.4195                         | 0.0671                           | 0.7776                         | -0.0235                          |
| NSR1        | 0.0002735                        | 0.2959                             | 0.06448                        | 0.1529                           | 0.726                          | -0.0291                          |
| YRA2        | 0.5675                           | 0.0475                             | 0.3744                         | 0.0738                           | 0.5277                         | -0.0525                          |
| ATG8        | 0.0038                           | 0.2398                             | 0.000353                       | 0.2937                           | 0.4777                         | -0.0596                          |
| NAB6        | 0.0008323                        | -0.2718                            | 0.1411                         | -0.1215                          | 0.2064                         | -0.1045                          |
| KHD1        | 0.007009                         | 0.2208                             | 0.004543                       | -0.232                           | 0.001338                       | -0.2613                          |
| YLL032C     | 0.08184                          | 0.144                              | 8.00E-06                       | -0.359                           | 0.001191                       | -0.2648                          |
| PUB1        | 0.001347                         | 0.2611                             | 0.0004592                      | -0.2844                          | 7.09E-05                       | -0.3207                          |
| YPL184C     | 9.65E-06                         | 0.3582                             | 0.0002026                      | -0.3032                          | 1.38E-05                       | -0.3522                          |
| CBC2        | 0.00281                          | 0.2453                             | 0.002982                       | -0.2439                          | 5.71E-06                       | -0.3668                          |
| PUF3        | 1.19E-05                         | 0.3525                             | 1.59E-05                       | -0.3477                          | 4.40E-06                       | -0.3685                          |
| NPL3        | 0.0006563                        | 0.2779                             | 0.0002556                      | -0.2975                          | 3.67E-06                       | -0.3726                          |
| GBP2        | 6.83E-12                         | 0.5273                             | 0.0007458                      | -0.2751                          | 1.76E-06                       | -0.3824                          |
| SHE2        | 5.67E-07                         | 0.4033                             | 0.009798                       | -0.2135                          | 8.29E-07                       | -0.3978                          |
| HRB1        | 0.003687                         | 0.2373                             | 4.30E-08                       | -0.4317                          | 4.66E-07                       | -0.4002                          |
| MSL5        | 0.8159                           | -0.0194                            | 3.77E-05                       | -0.333                           | 9.78E-08                       | -0.4225                          |
| SSD1        | 0.2702                           | 0.0915                             | 1.27E-08                       | -0.4481                          | 4.40E-08                       | -0.4327                          |
| SGN1        | 4.80E-07                         | 0.4011                             | 3.35E-05                       | -0.3351                          | 7.60E-09                       | -0.4541                          |
| PIN4        | 0.0008308                        | 0.2746                             | 2.90E-08                       | -0.4437                          | 7.40E-09                       | -0.4606                          |
| PUF4        | 8.14E-09                         | 0.4519                             | 1.33E-08                       | -0.4461                          | 1.56E-09                       | -0.4708                          |
| SKI2        | 2.20E-16                         | 0.8104                             | 3.75E-07                       | 0.4097                           | 2.01E-10                       | -0.5002                          |
| PUF5        | 0.0002383                        | 0.2989                             | 2.20E-16                       | -0.5416                          | 7.80E-11                       | -0.5034                          |
| PUF2        | 6.74E-07                         | 0.4008                             | 4.00E-12                       | -0.5183                          | 2.20E-16                       | -0.5329                          |
| NAB3        | 0.004614                         | 0.2324                             | 8.09E-15                       | -0.5841                          | 1.96E-12                       | -0.5386                          |
| SCP160      | 2.20E-16                         | 0.7753                             | 3.12E-08                       | -0.4414                          | 2.20E-16                       | -0.5738                          |
| NRD1        | 0.004833                         | 0.2317                             | 2.20E-16                       | -0.6756                          | 2.20E-16                       | -0.5886                          |
| NAB2        | 1.57E-08                         | 0.4454                             | 4.39E-11                       | -0.5095                          | 2.40E-16                       | -0.61                            |
| PUF1        | 6.79E-10                         | 0.4828                             | 2.20E-16                       | -0.6277                          | 2.20E-16                       | -0.6306                          |
| VTS1        | 1.05E-06                         | 0.3899                             | 2.40E-09                       | -0.4674                          | 2.20E-16                       | -0.6675                          |
| BFR1        | 2.20E-16                         | 0.6542                             | 2.20E-16                       | -0.6437                          | 2.20E-16                       | -0.6812                          |

<sup>a</sup> Linear regression between RBP expression and the *mean/SD/CD* expression of all its target genes. Spearman correlation coefficient and P values for analysis are shown.

**Supplementary Table 2: The details of the used data.**

| <b>Experiment</b> | <b>Accession</b> | <b>SRA_file</b> | <b>Pubmed</b>    |
|-------------------|------------------|-----------------|------------------|
| SRR014            | SRR014335        | SRR014335.sra   | pubmed(19096707) |
| SRR014            | SRR014336        | SRR014336.sra   | pubmed(19096707) |
| SRR014            | SRR014337        | SRR014337.sra   | pubmed(19096707) |
| SRR014            | SRR014338        | SRR014338.sra   | pubmed(19096707) |
| SRR014            | SRR014339        | SRR014339.sra   | pubmed(19096707) |
| SRR014            | SRR014340        | SRR014340.sra   | pubmed(19096707) |
| SRR014            | SRR014341        | SRR014341.sra   | pubmed(19096707) |
| SRR014            | SRR014342        | SRR014342.sra   | pubmed(19096707) |
| SRR014            | SRR014343        | SRR014343.sra   | pubmed(19096707) |
| SRR014            | SRR014344        | SRR014344.sra   | pubmed(19096707) |
| SRR014            | SRR014345        | SRR014345.sra   | pubmed(19096707) |
| SRR014            | SRR014346        | SRR014346.sra   | pubmed(19096707) |
| SRR014            | SRR014347        | SRR014347.sra   | pubmed(19096707) |
| SRR014            | SRR014348        | SRR014348.sra   | pubmed(19096707) |
| SRR014            | SRR014349        | SRR014349.sra   | pubmed(19096707) |
| SRR014            | SRR014350        | SRR014350.sra   | pubmed(19096707) |
| SRR039            | SRR039228        | SRR039228.sra   | pubmed(20635087) |
| SRR039            | SRR039229        | SRR039229.sra   | pubmed(20635087) |
| SRR039            | SRR039177        | SRR039177.sra   | pubmed(21072241) |
| SRR039            | SRR039178        | SRR039178.sra   | pubmed(21072241) |
| SRR039            | SRR039179        | SRR039179.sra   | pubmed(21072241) |
| SRR039            | SRR039180        | SRR039180.sra   | pubmed(21072241) |
| SRR070            | SRR070667        | SRR070667.sra   | pubmed(21145465) |
| SRR089            | SRR089718        | SRR089718.sra   | pubmed(20944018) |
| SRR089            | SRR089720        | SRR089720.sra   | pubmed(20944018) |
| SRR089            | SRR089721        | SRR089721.sra   | pubmed(20944018) |
| SRR089            | SRR089723        | SRR089723.sra   | pubmed(20944018) |
| SRR089            | SRR089724        | SRR089724.sra   | pubmed(20944018) |
| SRR089            | SRR089725        | SRR089725.sra   | pubmed(20944018) |
| SRR089            | SRR089726        | SRR089726.sra   | pubmed(20944018) |
| SRR089            | SRR089727        | SRR089727.sra   | pubmed(20944018) |
| SRR089            | SRR089728        | SRR089728.sra   | pubmed(20944018) |
| SRR089            | SRR089729        | SRR089729.sra   | pubmed(20944018) |
| SRR089            | SRR089732        | SRR089732.sra   | pubmed(20944018) |
| SRR089            | SRR089734        | SRR089734.sra   | pubmed(20944018) |
| SRR089            | SRR089735        | SRR089735.sra   | pubmed(20944018) |
| SRR089            | SRR089736        | SRR089736.sra   | pubmed(20944018) |
| SRR089            | SRR089737        | SRR089737.sra   | pubmed(20944018) |
| SRR089            | SRR089738        | SRR089738.sra   | pubmed(20944018) |
| SRR089            | SRR089739        | SRR089739.sra   | pubmed(20944018) |

|        |           |               |                  |
|--------|-----------|---------------|------------------|
| SRR089 | SRR089740 | SRR089740.sra | pubmed(20944018) |
| SRR089 | SRR089741 | SRR089741.sra | pubmed(20944018) |
| SRR089 | SRR089742 | SRR089742.sra | pubmed(20944018) |
| SRR089 | SRR089743 | SRR089743.sra | pubmed(20944018) |
| SRR089 | SRR089744 | SRR089744.sra | pubmed(20944018) |
| SRR089 | SRR089745 | SRR089745.sra | pubmed(20944018) |
| SRR089 | SRR089746 | SRR089746.sra | pubmed(20944018) |
| SRR089 | SRR089747 | SRR089747.sra | pubmed(20944018) |
| SRR122 | SRR122033 | SRR122033.sra | pubmed(21697827) |
| SRR122 | SRR122107 | SRR122107.sra | pubmed(21697827) |
| SRR122 | SRR122141 | SRR122141.sra | pubmed(21697827) |
| SRR122 | SRR122142 | SRR122142.sra | pubmed(21697827) |
| SRR122 | SRR122143 | SRR122143.sra | pubmed(21697827) |
| SRR122 | SRR122149 | SRR122149.sra | pubmed(21697827) |
| SRR122 | SRR122150 | SRR122150.sra | pubmed(21697827) |
| SRR122 | SRR122155 | SRR122155.sra | pubmed(21697827) |
| SRR122 | SRR122176 | SRR122176.sra | pubmed(21697827) |
| SRR122 | SRR122177 | SRR122177.sra | pubmed(21697827) |
| SRR122 | SRR122186 | SRR122186.sra | pubmed(21697827) |
| SRR122 | SRR122187 | SRR122187.sra | pubmed(21697827) |
| SRR122 | SRR122188 | SRR122188.sra | pubmed(21697827) |
| SRR122 | SRR122198 | SRR122198.sra | pubmed(21697827) |
| SRR122 | SRR122199 | SRR122199.sra | pubmed(21697827) |
| SRR122 | SRR122200 | SRR122200.sra | pubmed(21697827) |
| SRR122 | SRR122201 | SRR122201.sra | pubmed(21697827) |
| SRR122 | SRR122202 | SRR122202.sra | pubmed(21697827) |
| SRR122 | SRR122203 | SRR122203.sra | pubmed(21697827) |
| SRR122 | SRR122204 | SRR122204.sra | pubmed(21697827) |
| SRR122 | SRR122205 | SRR122205.sra | pubmed(21697827) |
| SRR122 | SRR122206 | SRR122206.sra | pubmed(21697827) |
| SRR122 | SRR122207 | SRR122207.sra | pubmed(21697827) |
| SRR122 | SRR122208 | SRR122208.sra | pubmed(21697827) |
| SRR122 | SRR122209 | SRR122209.sra | pubmed(21697827) |
| SRR122 | SRR122210 | SRR122210.sra | pubmed(21697827) |
| SRR122 | SRR122211 | SRR122211.sra | pubmed(21697827) |
| SRR202 | SRR202029 | SRR202029.sra | pubmed(21730963) |
| SRR202 | SRR202030 | SRR202030.sra | pubmed(21730963) |
| SRR202 | SRR202031 | SRR202031.sra | pubmed(21730963) |
| SRR202 | SRR202032 | SRR202032.sra | pubmed(21730963) |
| SRR202 | SRR202033 | SRR202033.sra | pubmed(21730963) |
| SRR202 | SRR202034 | SRR202034.sra | pubmed(21730963) |
| SRR202 | SRR202035 | SRR202035.sra | pubmed(21730963) |
| SRR202 | SRR202036 | SRR202036.sra | pubmed(21730963) |

|        |           |               |                  |
|--------|-----------|---------------|------------------|
| SRR202 | SRR202037 | SRR202037.sra | pubmed(21730963) |
| SRR202 | SRR202038 | SRR202038.sra | pubmed(21730963) |
| SRR202 | SRR202039 | SRR202039.sra | pubmed(21730963) |
| SRR202 | SRR202040 | SRR202040.sra | pubmed(21730963) |
| SRR202 | SRR202041 | SRR202041.sra | pubmed(21730963) |
| SRR202 | SRR202042 | SRR202042.sra | pubmed(21730963) |
| SRR202 | SRR202043 | SRR202043.sra | pubmed(21730963) |
| SRR202 | SRR202044 | SRR202044.sra | pubmed(21730963) |
| SRR309 | SRR309119 | SRR309119.sra | pubmed(21072241) |
| SRR309 | SRR309120 | SRR309120.sra | pubmed(21072241) |
| SRR332 | SRR332049 | SRR332049.sra | pubmed(21921191) |
| SRR332 | SRR332050 | SRR332050.sra | pubmed(21921191) |
| SRR332 | SRR332051 | SRR332051.sra | pubmed(21921191) |
| SRR332 | SRR332052 | SRR332052.sra | pubmed(21921191) |
| SRR363 | SRR363968 | SRR363968.sra | pubmed(22341442) |
| SRR363 | SRR363969 | SRR363969.sra | pubmed(22341442) |
| SRR363 | SRR363970 | SRR363970.sra | pubmed(22341442) |
| SRR363 | SRR363971 | SRR363971.sra | pubmed(22341442) |
| SRR387 | SRR387838 | SRR387838.sra | pubmed(22194413) |
| SRR387 | SRR387839 | SRR387839.sra | pubmed(22194413) |
| SRR387 | SRR387840 | SRR387840.sra | pubmed(22194413) |
| SRR387 | SRR387841 | SRR387841.sra | pubmed(22194413) |
| SRR387 | SRR387842 | SRR387842.sra | pubmed(22194413) |
| SRR387 | SRR387843 | SRR387843.sra | pubmed(22194413) |
| SRR387 | SRR387844 | SRR387844.sra | pubmed(22194413) |
| SRR387 | SRR387845 | SRR387845.sra | pubmed(22194413) |
| SRR387 | SRR387846 | SRR387846.sra | pubmed(22194413) |
| SRR387 | SRR387847 | SRR387847.sra | pubmed(22194413) |
| SRR387 | SRR387848 | SRR387848.sra | pubmed(22194413) |
| SRR387 | SRR387849 | SRR387849.sra | pubmed(22194413) |
| SRR387 | SRR387850 | SRR387850.sra | pubmed(22194413) |
| SRR387 | SRR387851 | SRR387851.sra | pubmed(22194413) |
| SRR387 | SRR387852 | SRR387852.sra | pubmed(22194413) |
| SRR387 | SRR387853 | SRR387853.sra | pubmed(22194413) |
| SRR387 | SRR387854 | SRR387854.sra | pubmed(22194413) |
| SRR387 | SRR387855 | SRR387855.sra | pubmed(22194413) |
| SRR387 | SRR387856 | SRR387856.sra | pubmed(22194413) |
| SRR387 | SRR387857 | SRR387857.sra | pubmed(22194413) |
| SRR387 | SRR387858 | SRR387858.sra | pubmed(22194413) |
| SRR387 | SRR387859 | SRR387859.sra | pubmed(22194413) |
| SRR387 | SRR387860 | SRR387860.sra | pubmed(22194413) |
| SRR387 | SRR387861 | SRR387861.sra | pubmed(22194413) |

|        |           |               |                  |
|--------|-----------|---------------|------------------|
| SRR387 | SRR387862 | SRR387862.sra | pubmed(22194413) |
| SRR387 | SRR387863 | SRR387863.sra | pubmed(22194413) |
| SRR387 | SRR387864 | SRR387864.sra | pubmed(22194413) |
| SRR387 | SRR387865 | SRR387865.sra | pubmed(22194413) |
| SRR387 | SRR387866 | SRR387866.sra | pubmed(22194413) |
| SRR387 | SRR387867 | SRR387867.sra | pubmed(22194413) |
| SRR387 | SRR387868 | SRR387868.sra | pubmed(22194413) |
| SRR387 | SRR387869 | SRR387869.sra | pubmed(22194413) |
| SRR387 | SRR387870 | SRR387870.sra | pubmed(22194413) |
| SRR390 | SRR390921 | SRR390921.sra | pubmed(22177264) |
| SRR390 | SRR390922 | SRR390922.sra | pubmed(22177264) |
| SRR390 | SRR390923 | SRR390923.sra | pubmed(22177264) |
| SRR390 | SRR390924 | SRR390924.sra | pubmed(22177264) |
| SRR390 | SRR390925 | SRR390925.sra | pubmed(22177264) |
| SRR390 | SRR390926 | SRR390926.sra | pubmed(22177264) |
| SRR390 | SRR390927 | SRR390927.sra | pubmed(22177264) |
| SRR390 | SRR390928 | SRR390928.sra | pubmed(22177264) |
| SRR390 | SRR390929 | SRR390929.sra | pubmed(22177264) |
| SRR390 | SRR390930 | SRR390930.sra | pubmed(22177264) |
| SRR390 | SRR390931 | SRR390931.sra | pubmed(22177264) |
| SRR390 | SRR390932 | SRR390932.sra | pubmed(22177264) |
| SRR390 | SRR390933 | SRR390933.sra | pubmed(22177264) |
| SRR390 | SRR390934 | SRR390934.sra | pubmed(22177264) |

## Supplementary Figures

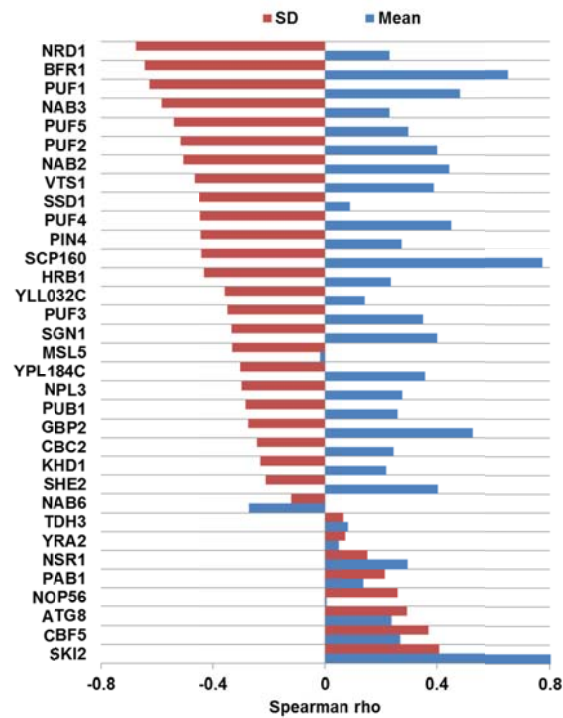

**Supplementary Figure 1.** The correlation coefficients (spearman rho) between 33 RBP gene expression and the mean (and SD) of their target gene expression. RBPs are ordered based on the spearman rho for the SD values.

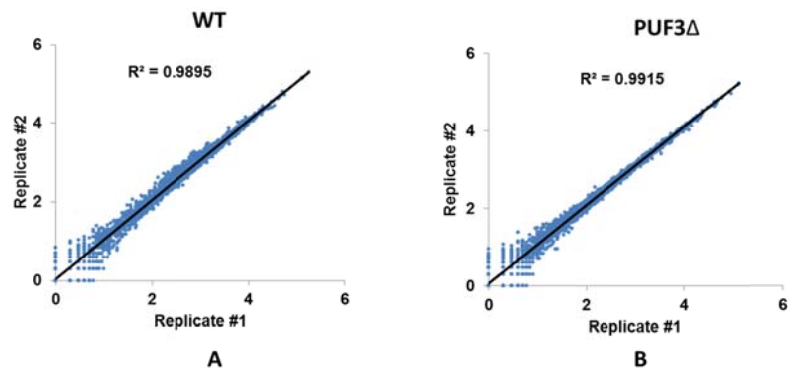

**Supplementary Figure 2.** The RNA-Seq results for the WT parental strain (A) and the PUF3 $\Delta$  strain (B) in YPGE. The correlations of sequence reads between two replicates ( $\log_{10}$ RPKM) are shown.
